# Supplementary material for: Synergistic effect of seaweed extract and boric acid and/or calcium chloride on productivity and physico-chemical properties of Valencia orange
Source: PeerJ. 2024 May 6;12:e17378. doi: 10.7717/peerj.17378 (PMC11080991; doi:10.7717/peerj.17378)
Supplement: Supplemental Information 1 [file peerj-12-17378-s001.xlsx]

## Sheet: Frist season
SW	Fe	Replicates	Chlor.	N	P	K	Ca	Mg	Fe	B	Fruit set	Fruit drop %	fruit retention%	Fruit weigh	yield	yield increment	Peel weight	Pulp weight	Fruit volume	Fruit length	Fruit diameter	Shape index	Juice volume	TSS	Acidity	TSS/ Acidity	Total sugars	Reducing Sugar	Vitamin C
			Y1	Y2	Y3	Y4	Y5	Y6	Y7	Y8	Y9	Y10	Y11	Y12	Y13	Y14	Y15	Y16	Y17	Y18	Y19	Y20	Y21	Y22	Y23	Y24	Y25	Y26	Y27
SW1	Fe1	R1	29.6	1.05	0.08	0.48	2.22	0.17	43	20	2.85714	50	50	149	37.25	0	18	131	100	6.38	5.42	1.17712	71	10.8	1.35	8	7.2	2.9	38
SW1	Fe1	R2	29.3	1.08	0.09	0.55	2.38	0.16	48	22	2.9703	50	50	152	39.52	0	18	134	104	6.45	5.38	1.19888	72	11	1.4	7.85714	7.15	2.95	38
SW1	Fe1	R3	29.5	0.96	0.08	0.46	2.25	0.15	43	20	3.30189	57.1429	42.8571	154	39.27	0	17	137	98	6.48	5.36	1.20896	70	10.9	1.25	8.72	7.25	2.9	39
SW1	Fe1	R4	29.2	0.98	0.08	0.52	2.35	0.16	48	22	2.92683	50	50	152	37.088	0	19	133	106	6.42	5.44	1.18015	72	11	1.4	7.85714	7.15	2.9	39
SW1	Fe2	R1	42.2	1.25	0.11	0.76	2.92	0.27	68	30	4.8583	33.3333	66.6667	187	45.067	21.7406	24	163	130	7.25	6.14	1.18078	82	11.2	1.24	9.03226	7.8	3.35	41
SW1	Fe2	R2	41.7	1.3	0.12	0.73	2.86	0.28	72	28	4.83871	41.6667	58.3333	176	44	12.4598	22	154	122	7.25	6.16	1.17695	81	11.4	1.18	9.66102	7.8	3.34	40
SW1	Fe2	R3	40.6	1.35	0.12	0.76	2.94	0.28	73	30	4.60251	36.3636	63.6364	184	46	18.7175	25	159	127	7.22	5.98	1.20736	83	11.2	1.26	8.88889	7.9	3.38	41
SW1	Fe2	R4	41.9	1.28	0.11	0.74	2.9	0.27	67	28	4.72441	41.6667	58.3333	186	45.198	22.5555	21	165	123	7.22	5.94	1.21549	81	11.4	1.18	9.66102	7.9	3.32	42
SW1	Fe3	R1	39.3	1.2	0.1	0.69	2.82	0.23	64	34	4.93274	36.3636	63.6364	177	51.33	39.1593	19	158	117	7.16	5.92	1.20946	79	11.7	1.16	10.0862	8.2	3.52	43
SW1	Fe3	R2	38.8	1.18	0.11	0.71	2.76	0.23	62	33	5.04202	41.6667	58.3333	173	50.516	30.5821	21	152	114	7.15	5.98	1.19565	78	11.6	1.18	9.83051	8.18	3.49	42
SW1	Fe3	R3	39.7	1.16	0.11	0.72	2.84	0.25	64	35	4.88889	27.2727	72.7273	178	51.264	33.3577	20	158	115	7.15	6.04	1.18377	76	11.5	1.2	9.58333	8.18	3.47	44
SW1	Fe3	R4	38.7	1.24	0.1	0.68	2.78	0.25	62	31	5.17241	41.6667	58.3333	180	52.2	42.0295	20	160	114	7.12	5.96	1.19463	78	11.6	1.18	9.83051	8.25	3.52	40
SW1	Fe4	R1	44.9	1.35	0.13	0.82	3.08	0.3	78	36	5.22388	35.7143	64.2857	186	56.916	54.6951	27	159	132	7.32	6.26	1.16933	87	11.9	1.15	10.3478	8.35	3.65	45
SW1	Fe4	R2	45.3	1.37	0.15	0.84	3.02	0.29	75	35	5.24345	28.5714	71.4286	188	56.964	48.5152	25	163	128	7.34	6.24	1.17628	85	11.7	1.16	10.0862	8.35	3.68	43
SW1	Fe4	R3	43.9	1.32	0.15	0.74	2.94	0.29	72	34	5.40541	35.7143	64.2857	184	55.384	44.8162	23	161	129	7.28	6.32	1.1519	86	11.8	1.12	10.5357	8.32	3.6	45
SW1	Fe4	R4	44.8	1.38	0.13	0.8	2.96	0.3	74	35	5.11811	38.4615	61.5385	188	57.34	56.3248	25	163	131	7.26	6.3	1.15238	84	11.8	1.13	10.4425	8.35	3.6	43
SW2	Fe1	R1	49.8	1.5	0.2	1.04	3.26	0.36	81	42	4.4	45.4545	54.5455	200	62.4	69.9471	30	170	147	7.68	6.45	1.1907	93	11.1	1.28	8.67188	7.54	3.08	38
SW2	Fe1	R2	50.8	1.57	0.21	1.05	3.38	0.34	80	40	4.15094	45.4545	54.5455	202	62.62	64.2457	27	175	143	7.58	6.45	1.17519	92	10.9	1.32	8.25758	7.56	3.05	40
SW2	Fe1	R3	49.9	1.52	0.22	0.95	3.26	0.34	79	38	4.36364	41.6667	58.3333	198	60.984	60.3909	28	170	145	7.62	6.42	1.18692	93	11.2	1.34	8.35821	7.46	3.02	39
SW2	Fe1	R4	51.9	1.58	0.2	0.96	3.32	0.36	81	41	4.29688	36.3636	63.6364	195	60.45	64.9744	27	168	145	7.52	6.42	1.17134	91	11.2	1.26	8.88889	7.48	3.05	39
SW2	Fe2	R1	57.7	1.75	0.28	1.18	3.54	0.4	94	46	5.71429	31.25	68.75	218	70.85	93.4483	33	185	168	7.95	6.65	1.19549	101	11.9	1.14	10.4386	8.46	3.7	46
SW2	Fe2	R2	56.5	1.72	0.27	1.15	3.48	0.41	95	43	5.08475	33.3333	66.6667	212	69.96	84.6597	32	180	166	8.05	6.68	1.20509	102	12.1	1.1	11	8.48	3.75	47
SW2	Fe2	R3	57.3	1.75	0.28	1.12	3.55	0.39	96	45	5.76271	29.4118	70.5882	210	68.46	81.1832	30	180	164	7.96	6.72	1.18452	100	12.1	1.14	10.614	8.46	3.75	45
SW2	Fe2	R4	56.4	1.78	0.27	1.15	3.46	0.4	97	46	5.59441	31.25	68.75	218	70.632	93.2925	33	185	162	7.04	6.72	1.04762	102	11.9	1.1	10.8182	8.44	3.7	45
SW2	Fe3	R1	55.7	1.67	0.25	1.06	3.38	0.38	83	48	6.2963	23.5294	76.4706	206	72.1	96.9248	28	178	160	7.84	6.7	1.17015	98	12.4	1.06	11.6981	8.7	3.92	49
SW2	Fe3	R2	53.5	1.62	0.22	1.14	3.42	0.37	85	49	6.06061	25	75	212	73.776	95.2727	29	183	158	7.96	6.72	1.18452	96	12.5	1.1	11.3636	8.68	3.86	50
SW2	Fe3	R3	52.9	1.68	0.22	1.12	3.36	0.39	86	47	6.15942	23.5294	76.4706	214	74.044	96.7134	32	182	162	7.88	6.66	1.18318	98	12.3	1.06	11.6038	8.68	3.88	50
SW2	Fe3	R4	52.8	1.64	0.25	1.08	3.42	0.36	88	48	5.67376	25	75	208	72.8	99.3222	31	177	160	7.82	6.72	1.16369	96	12.5	1.1	11.3636	8.7	3.92	49
SW2	Fe4	R1	57.7	1.85	0.31	1.18	3.64	0.43	101	52	6.41026	25	75	222	79.92	118.674	34	188	174	8.16	6.84	1.19298	107	12.7	1.05	12.0952	8.82	4.02	51
SW2	Fe4	R2	60.4	1.86	0.31	1.22	3.55	0.42	103	48	6.10169	22.2222	77.7778	218	77.608	105.93	36	182	172	8.18	6.8	1.20294	106	12.6	1.06	11.8868	8.79	4.05	52
SW2	Fe4	R3	59.9	1.84	0.32	1.26	3.64	0.43	98	49	6.22951	21.0526	78.9474	212	75.048	99.5057	34	178	167	8.12	6.82	1.19062	107	12.5	1.04	12.0192	8.79	4.02	51
SW2	Fe4	R4	59.8	1.85	0.32	1.14	3.62	0.44	99	51	6.12903	21.0526	78.9474	210	75.6	107.11	32	178	168	8.14	6.78	1.20059	105	12.6	1.05	12	8.82	3.96	52
SW3	Fe1	R1	61.9	1.95	0.38	1.28	3.86	0.48	114	56	4.64396	40	60	200	65.6	78.847	31	169	154	7.86	6.62	1.18731	112	11.1	1.24	8.95161	7.58	3.16	41
SW3	Fe1	R2	62.5	2.1	0.36	1.32	3.76	0.46	115	55	4.38871	42.8571	57.1429	204	67.728	78.4521	30	174	146	7.74	6.58	1.17629	114	10.9	1.26	8.65079	7.62	3.22	40
SW3	Fe1	R3	61.5	2	0.39	1.35	3.88	0.48	110	57	4.55927	40	60	205	66.83	76.6498	29	176	152	7.86	6.56	1.19817	112	11.2	1.22	9.18033	7.62	3.16	39
SW3	Fe1	R4	61.7	1.95	0.36	1.25	3.88	0.46	109	57	4.375	35.7143	64.2857	201	66.33	81.3278	30	171	149	7.84	6.64	1.18072	114	11.3	1.28	8.82812	7.58	3.18	40
SW3	Fe2	R1	66.3	2.4	0.47	1.47	4.24	0.56	122	64	5.71429	25	75	232	82.36	125.46	41	191	180	8.35	7.14	1.16947	120	12.3	1.12	10.9821	8.58	3.82	48
SW3	Fe2	R2	67.2	2.35	0.46	1.49	4.15	0.54	123	62	5.69106	28.5714	71.4286	226	79.1	110.08	39	187	186	8.25	6.98	1.18195	121	12.1	1.1	11	8.6	3.84	48
SW3	Fe2	R3	68.9	2.32	0.45	1.48	4.25	0.58	124	63	5.80475	36.3636	63.6364	224	78.848	110.074	42	182	175	8.26	6.96	1.18678	122	12.2	1.08	11.2963	8.56	3.82	47
SW3	Fe2	R4	67.4	2.34	0.46	1.42	4.24	0.56	122	59	5.55556	25	75	229	81.295	122.948	38	191	179	8.34	7.12	1.17135	122	12.2	1.1	11.0909	8.56	3.84	47
SW3	Fe3	R1	65.3	2.22	0.41	1.36	3.95	0.53	116	66	6.47059	22.7273	77.2727	226	83.62	128.964	36	190	174	8.16	6.76	1.2071	118	12.7	1.04	12.2115	8.94	4.06	53
SW3	Fe3	R2	64.89	2.18	0.42	1.42	3.98	0.51	121	68	6.01719	19.0476	80.9524	222	83.25	121.622	37	185	176	8.18	6.84	1.19591	117	12.9	1.02	12.6471	8.92	4.14	54
SW3	Fe3	R3	63.8	2.16	0.41	1.36	4.02	0.52	118	64	6.56716	18.1818	81.8182	225	86.4	131.078	35	190	172	8.22	6.72	1.22321	116	12.9	1.04	12.4038	8.92	4.1	55
SW3	Fe3	R4	64.7	2.24	0.42	1.44	4.05	0.52	120	66	6.57143	21.7391	78.2609	223	84.294	131.289	36	187	178	8.24	6.84	1.20468	116	12.7	1.02	12.451	8.94	4.16	53
SW3	Fe4	R1	71.7	2.4	0.49	1.52	4.34	0.6	125	71	6.84211	19.2308	80.7692	236	92.04	152.382	43	193	190	8.38	7.12	1.17697	128	12.9	1.01	12.7723	9.06	4.18	55
SW3	Fe4	R2	68.2	2.48	0.48	1.55	4.28	0.58	131	73	6.23306	17.3913	82.6087	230	87.4	133.164	44	186	183	8.38	7.14	1.17367	124	13.1	1.02	12.8431	9.05	4.26	55
SW3	Fe4	R3	69.1	2.44	0.47	1.44	4.32	0.64	126	70	6.01504	16.6667	83.3333	234	90.09	141.341	42	192	186	8.44	7.14	1.18207	126	13.1	0.99	13.2323	9.08	4.24	56
SW3	Fe4	R4	67.9	2.46	0.49	1.48	4.38	0.62	130	66	6.92308	18.5185	81.4815	238	94.248	158.973	39	199	185	8.42	7.18	1.1727	128	12.9	1.02	12.6471	9.06	4.22	54

## Sheet: Second season
SW	Fe	Replicates	Chlor.	N	P	K	Ca	Mg	Fe	B	Fruit set	Fruit drop %	fruit retention%	Fruit weigh	yield	yield increment	Peel weight	Pulp weight	Fruit volume	Fruit length	Fruit diameter	Shape index	Juice volume	TSS	Acidity	TSS/ Acidity	Total sugars	Reducing Sugar	Vitamin C
			Y1	Y2	Y3	Y4	Y5	Y6	Y7	Y8	Y9	Y10	Y11	Y12	Y13	Y14	Y15	Y16	Y17	Y18	Y19	Y20	Y21	Y22	Y23	Y24	Y25	Y26	Y27
SW1	Fe1	R1	29.7	1.2	0.09	0.58	2.34	0.17	50	24	3.18182	57.1429	42.8571	159	40.068	0	19	140	103	6.75	5.82	1.15979	72	10.9	1.4	7.78571	8.1	2.95	42
SW1	Fe1	R2	30.3	1.18	0.09	0.58	2.32	0.18	48	26	3.30189	42.8571	57.1429	154	39.732	0	18	136	104	6.85	5.78	1.18512	72	11	1.4	7.85714	7.9	3.15	43
SW1	Fe1	R3	29.9	1.16	0.08	0.56	2.34	0.17	51	23	3.6036	62.5	37.5	154	38.654	0	19	135	105	6.88	5.76	1.19444	73	10.9	1.35	8.07407	7.95	3.1	45
SW1	Fe1	R4	30.2	1.24	0.09	0.56	2.38	0.18	52	24	3.72093	50	50	153	37.638	0	19	134	106	6.82	5.86	1.16382	71	11	1.35	8.14815	8.05	2.9	42
SW1	Fe2	R1	44.2	1.35	0.14	0.88	2.98	0.3	75	32	5.44747	35.7143	64.2857	187	46.376	17.5438	24	163	132	7.65	6.44	1.18789	85	11.7	1.24	9.43548	8.8	3.45	47
SW1	Fe2	R2	43.7	1.41	0.15	0.85	2.96	0.28	79	28	5.03876	38.4615	61.5385	186	46.314	18.3058	23	163	130	7.55	6.46	1.16873	84	11.5	1.22	9.42623	8.7	3.5	48
SW1	Fe2	R3	43.6	1.42	0.12	0.86	2.94	0.28	73	31	5.13834	38.4615	61.5385	184	46	20.4307	25	159	127	7.55	6.34	1.19085	83	11.6	1.26	9.20635	8.9	3.55	44
SW1	Fe2	R4	44.5	1.38	0.14	0.84	2.96	0.3	77	29	5	38.4615	61.5385	186	46.128	23.6124	23	163	130	7.65	6.34	1.20662	83	11.5	1.22	9.42623	8.6	3.5	45
SW1	Fe3	R1	40.3	1.25	0.12	0.73	2.82	0.25	66	34	5.5794	38.4615	61.5385	177	52.038	33.2909	21	156	118	7.46	6.32	1.18038	80	11.8	1.2	9.83333	8.9	3.6	47
SW1	Fe3	R2	39.8	1.3	0.12	0.74	2.86	0.23	62	33	5.64516	35.7143	64.2857	183	53.436	38.1135	21	162	124	7.55	6.28	1.20223	78	11.8	1.18	10	8.88	3.65	48
SW1	Fe3	R3	39.7	1.35	0.11	0.76	2.84	0.25	67	35	5.10638	33.3333	66.6667	180	52.2	37.6741	22	158	115	7.45	6.34	1.17508	79	11.9	1.2	9.91667	8.88	3.55	44
SW1	Fe3	R4	40.6	1.28	0.1	0.76	2.88	0.23	64	31	5.3719	30.7692	69.2308	180	52.56	41.501	20	160	122	7.52	6.26	1.20128	80	11.7	1.2	9.75	8.75	3.6	49
SW1	Fe4	R1	46.1	1.5	0.14	0.96	3.18	0.32	88	36	5.7554	31.25	68.75	196	60.172	55.9132	29	167	137	7.72	6.62	1.16616	87	12.1	1.15	10.5217	8.98	3.75	49
SW1	Fe4	R2	46.3	1.57	0.17	0.98	3.16	0.3	85	35	6.13718	29.4118	70.5882	188	57.904	50.5399	25	163	138	7.74	6.64	1.16566	89	11.9	1.16	10.2586	8.95	3.7	46
SW1	Fe4	R3	45.9	1.52	0.14	0.94	3.18	0.32	86	34	5.94796	31.25	68.75	184	56.12	48.5764	25	159	134	7.68	6.54	1.17431	86	12	1.18	10.1695	8.92	3.7	48
SW1	Fe4	R4	45.5	1.58	0.17	0.92	3.16	0.32	84	35	5.68182	33.3333	66.6667	188	58.092	56.8866	25	163	131	7.66	6.6	1.16061	88	12.1	1.18	10.2542	8.95	3.65	49
SW2	Fe1	R1	51.7	1.71	0.22	1.18	3.38	0.38	81	44	4.44444	41.6667	58.3333	200	62.8	63.2222	30	170	157	8.08	6.82	1.18475	97	11.1	1.34	8.28358	8.6	3.3	43
SW2	Fe1	R2	52.2	1.69	0.21	1.21	3.42	0.36	80	40	4.28571	41.6667	58.3333	202	62.62	63.6561	30	172	153	7.98	6.85	1.16496	96	11.2	1.32	8.48485	8.56	3.25	45
SW2	Fe1	R3	52.1	1.71	0.22	1.18	3.36	0.38	79	44	4.5614	46.1538	53.8462	206	64.272	71.2487	28	178	145	8.02	6.8	1.17941	95	11.2	1.34	8.35821	8.46	3.3	44
SW2	Fe1	R4	51.9	1.68	0.21	1.16	3.42	0.36	81	42	4.42804	41.6667	58.3333	204	64.056	73.4737	28	176	150	7.92	6.73	1.17682	98	11.2	1.32	8.48485	8.44	3.35	44
SW2	Fe2	R1	59.5	1.97	0.3	1.38	3.64	0.46	105	56	5.76271	29.4118	70.5882	218	72.376	89.855	33	185	168	8.35	7.15	1.16783	106	12.3	1.14	10.7895	9.12	3.75	49
SW2	Fe2	R2	60.5	1.94	0.29	1.35	3.55	0.48	107	53	6.12903	26.3158	73.6842	222	73.26	93.248	32	190	172	8.45	7.08	1.1935	104	12.2	1.15	10.6087	9.1	3.85	47
SW2	Fe2	R3	59.9	1.98	0.28	1.36	3.64	0.48	108	53	6.16883	26.3158	73.6842	220	73.04	95.6343	33	187	174	8.36	7.12	1.17416	107	12.2	1.14	10.7018	8.98	3.85	51
SW2	Fe2	R4	60.3	1.96	0.28	1.38	3.62	0.46	108	56	5.94059	27.7778	72.2222	220	73.48	99.6837	33	187	172	8.44	7.12	1.18539	104	12.3	1.15	10.6957	8.98	3.75	49
SW2	Fe3	R1	55.7	1.87	0.25	1.36	3.48	0.42	98	51	6.31579	22.2222	77.7778	216	76.032	100.023	28	188	167	8.24	7.1	1.16056	101	12.6	1.08	11.6667	9.12	4.04	54
SW2	Fe3	R2	56.5	1.87	0.22	1.24	3.52	0.44	95	49	6.09319	23.5294	76.4706	212	73.776	94.6831	33	179	168	8.36	7.11	1.17581	102	12.7	1.1	11.5455	9.16	3.95	55
SW2	Fe3	R3	55.3	1.89	0.22	1.32	3.56	0.42	96	49	6.18557	22.2222	77.7778	216	75.384	102.153	32	184	172	8.28	7.05	1.17447	98	12.6	1.08	11.6667	9.14	4.08	55
SW2	Fe3	R4	56.4	1.89	0.25	1.28	3.52	0.44	98	51	6.39731	21.0526	78.9474	218	76.3	107.527	31	187	160	8.32	7.12	1.16854	99	12.7	1.1	11.5455	9.16	4.04	52
SW2	Fe4	R1	62.7	2.15	0.38	1.48	3.86	0.58	112	60	6.11621	20	80	222	80.586	112.689	34	188	174	8.56	7.24	1.18232	112	12.9	1.07	12.0561	9.32	4.18	53
SW2	Fe4	R2	63.4	2.16	0.37	1.52	3.76	0.56	114	58	6.875	22.7273	77.2727	228	81.168	115.242	36	192	182	8.48	7.2	1.17778	109	12.8	1.06	12.0755	9.34	4.15	54
SW2	Fe4	R3	63.1	2.18	0.36	1.46	3.88	0.58	112	62	6.25	20	80	222	80.142	115.386	34	188	177	8.52	7.22	1.18006	112	12.9	1.06	12.1698	9.28	4.14	54
SW2	Fe4	R4	62.9	2.15	0.37	1.54	3.88	0.56	114	62	6.25	20	80	230	83.49	127.524	35	195	173	8.44	7.18	1.17549	108	12.7	1.05	12.0952	9.26	4.16	51
SW3	Fe1	R1	68.3	2.35	0.43	1.66	3.95	0.68	124	66	4.72813	40	60	210	69.51	81.8841	31	179	154	8.16	7.02	1.16239	116	11.4	1.26	9.04762	8.58	3.36	46
SW3	Fe1	R2	68.5	2.31	0.44	1.62	3.98	0.66	125	66	4.53461	42.1053	57.8947	204	67.728	77.8624	30	174	156	8.14	6.98	1.16619	115	11.3	1.26	8.96825	8.62	3.42	44
SW3	Fe1	R3	68.5	2.28	0.41	1.64	4.02	0.68	120	68	4.662	40	60	205	68.06	81.7839	31	174	157	8.26	6.96	1.18678	118	11.4	1.28	8.90625	8.62	3.44	44
SW3	Fe1	R4	68.2	2.25	0.43	1.66	4.05	0.68	124	68	4.7619	40	60	209	70.015	90.0469	32	177	159	8.24	7.04	1.17045	117	11.3	1.28	8.82812	8.58	3.38	46
SW3	Fe2	R1	74.5	2.65	0.52	1.78	4.34	0.86	138	74	6.22222	25	75	232	84.216	122.784	41	191	185	8.75	7.44	1.17608	127	12.5	1.12	11.1607	9.18	3.98	52
SW3	Fe2	R2	73.6	2.58	0.53	1.76	4.28	0.84	135	72	6.18337	24.1379	75.8621	236	85.904	128.414	42	194	186	8.65	7.38	1.17209	128	12.4	1.1	11.2727	9.22	3.92	51
SW3	Fe2	R3	74.1	2.64	0.55	1.79	4.32	0.88	139	74	5.84551	21.4286	78.5714	234	84.708	128.085	42	192	185	8.66	7.36	1.17663	127	12.5	1.12	11.1607	9.24	3.94	50
SW3	Fe2	R4	73.9	2.66	0.52	1.76	4.38	0.86	135	70	6.30435	27.5862	72.4138	229	84.043	129.062	39	190	189	8.74	7.42	1.1779	126	12.5	1.12	11.1607	9.16	3.98	51
SW3	Fe3	R1	72.3	2.52	0.49	1.69	4.24	0.73	128	90	6.36364	17.8571	82.1429	226	88.592	134.955	37	189	184	8.56	7.36	1.16304	123	13.1	1.04	12.5962	9.43	4.26	56
SW3	Fe3	R2	71.8	2.55	0.5	1.72	4.15	0.75	131	88	6.68151	20	80	232	90.016	139.85	37	195	181	8.55	7.24	1.18094	122	13.1	1.02	12.8431	9.46	4.34	57
SW3	Fe3	R3	71.9	2.57	0.48	1.74	4.25	0.78	138	90	6.66667	17.2414	82.7586	225	88.65	139.049	38	187	182	8.65	7.32	1.18169	119	12.9	1.04	12.4038	9.44	4.32	55
SW3	Fe3	R4	72.3	2.56	0.49	1.74	4.24	0.74	134	86	6.66667	20	80	233	89.938	145.457	36	197	178	8.64	7.28	1.18681	123	13.1	1.02	12.8431	9.48	4.28	52
SW3	Fe4	R1	75.7	2.76	0.54	1.82	4.54	0.9	145	96	6.875	18.1818	81.8182	255	99.45	165.153	43	212	190	8.78	7.52	1.16755	132	13.4	1.01	13.2673	9.56	4.48	57
SW3	Fe4	R2	76.2	2.78	0.56	1.85	4.58	0.93	141	98	6.82303	18.75	81.25	250	95	153.711	44	206	193	8.76	7.54	1.1618	134	13.3	1.01	13.1683	9.58	4.46	57
SW3	Fe4	R3	76.1	2.84	0.6	1.84	4.56	0.84	146	95	6.81363	14.7059	85.2941	252	97.02	162.327	43	209	191	8.84	7.44	1.18817	136	13.4	0.99	13.5354	9.52	4.44	56
SW3	Fe4	R4	75.9	2.78	0.59	1.88	4.52	0.92	150	98	6.73469	15.1515	84.8485	247	97.812	167.356	41	206	195	8.82	7.48	1.17914	132	13.3	0.99	13.4343	9.54	4.42	54
